# Supplementary material for: Oxygen as Possible Technological Adjuvant During the Crushing and/or the Malaxation Steps for the Modulation of the Characteristics of the Virgin Olive Oil
Source: Preprints.org preprint supplement (doi:10.20944/preprints202304.1081.v1), 2023-04-27
Supplement: Supplementary file 3 [file supplementary]

Tabla S1. Metabolites identified at different level according to their chemical group.

| Metabolite | Group label | Level |
| --- | --- | --- |
|  |  |  |
| 3-Methyl-furan | Furans | 2 |
|  |  |  |
| 3-Methyl-butanal | Adehydes no LOX | 1 |
| 2-Methyl-butanal | Adehydes no LOX | 1 |
| Octanal | Adehydes no LOX | 1 |
| Nonanal | Aldehyde no LOX | 1 |
| (E,E)-2,4-Hexadienal | Adehyde no LOX | 1 |
| Benzaldehyde | Adehyde no LOX | 1 |
| (Z)-2-Heptenal | Adehydes no LOX | 1 |
|  |  |  |
| Methanol | Alcohol no LOX | 1 |
| Ethanol | Alcohol no LOX | 1 |
| (Z)-2-Hepten-1-ol | Alcohol no LOX | 2 |
| Benzyl alcohol | Alcohol no LOX | 1 |
|  |  |  |
| 4-Methyl-2-pentanone | Ketone no LOX | 2 |
| 6-Methyl-5-hepten-2-one | Ketone no LOX | 1 |
| 2-Octanone | Ketone no LOX | 2 |
|  |  |  |
| Ethyl butyrate | Ester no LOX | 2 |
| Butyl acetate | Ester no LOX | 2 |
| Ethyl isovalerate | Ester no LOX | 2 |
|  |  |  |
| Toluene | HC aromático | 2 |
| Ethylbenzene | HC aromático | 1 |
|  |  |  |
| α-Ocimene | HC-monoterpene | 1 |
| (E)-4,8-Dimethylnona-1,3,7-triene | HC-Terpene | 2 |
|  |  |  |
| UK-1 | UK-1 | 4 |
| UK-2 | UK-2 | 4 |
|  |  |  |
| Hexanal | Aldehyde LOX | 1 |
| (Z)-2-Pentenal | Aldehyde LOX | 1 |
| (E)-2-Pentenal | Aldehyde LOX | 1 |
| (Z)-3-Hexenal | Aldehyde LOX | 1 |
| (E)-3-Hexenal | Aldehyde LOX | 1 |
| (Z)-2-Hexenal | Aldehyde LOX | 1 |
| (E)-2-Hexenal | Aldehyde LOX | 1 |
|  |  |  |
| 1-Penten-3-ol | Alcohol LOX | 1 |
| 1-Hexanol | Alcohol LOX | 1 |
| (Z)-3-Hexen-1-ol | Alcohol LOX | 1 |
|  |  |  |
| Hexyl acetate | Ester LOX | 1 |
| (Z)-3-Hexenyl acetate | Ester LOX | 1 |
|  |  |  |
| Pentene dimers | LOX hydrocarbons | 2 |
| 2-Pentanone | Ketone LOX | 1 |
| 3-Pentanone | Ketone LOX | 1 |
| 1-Penten-3-one | Ketone LOX | 1 |
|  |  |  |
| 4-Methyl-2-pentanol | Internal Standard | 1 |
